# Supplementary material
Source: PubMed Central journal article supplement (PMC5700750)
Supplement: NIHMS919054-supplement-ESI.pdf [file NIHMS919054-supplement-ESI.pdf]

# Apolipoprotein-enriched biomolecular corona switches the cellular uptake mechanism and trafficking pathway of lipid nanoparticles

L. Digiacoimo,<sup>a,b#</sup> F. Cardarelli,<sup>c#</sup> D. Pozzi,<sup>a</sup> S. Palchetti,<sup>a</sup> M. A. Digman,<sup>d</sup> E. Gratton,<sup>d</sup> A. L. Capriotti,<sup>g</sup> M. Mahmoudi,<sup>e,f\*</sup> and G. Caracciolo<sup>a\*</sup>

*<sup>a</sup>.Department of Molecular Medicine, Sapienza University of Rome, Viale Regina Elena 291, 00161 Rome, Italy*

*<sup>b</sup>.Department of Bioscience and Biotechnology, University of Camerino, Via Gentile III da Varano, 62032 Camerino, (MC), Italy*

*<sup>c</sup>.NEST, Istituto Nanoscienze, CNR and Scuola Normale Superiore, Piazza San Silvestro 12, Pisa, Italy*

*<sup>d</sup>.Laboratory for Fluorescence Dynamics, Biomedical Engineering Department, University of California Irvine, CA 92697, USA*

*<sup>e</sup>.Department of Anesthesiology, Brigham and Women's Hospital, Harvard Medical School, Boston, MA 02115, USA*

*<sup>f</sup>Nanotechnology Research Centre, Faculty of Pharmacy, Tehran University of Medical Sciences, Tehran 13169-43551, Iran*

*<sup>g</sup>.Department of Chemistry, Sapienza University of Rome, P.le Aldo Moro 5, 00185 Rome, Italy*

\*E-mail: Mmahmoudi@bwh.harvard.edu, giulio.caracciolo@uniroma1.it

#equal contribution

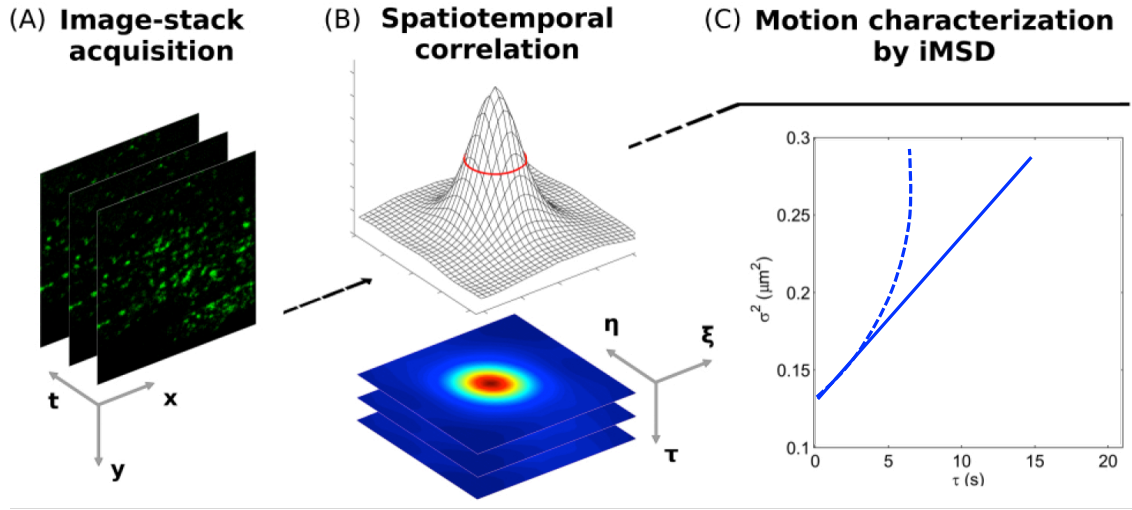

**Figure S1.** (A) Sequential image series are collected by a confocal microscope. (B) The spatiotemporal correlation function  $g$  of the fluorescence fluctuations  $\delta i$ , which are recorded pixel by pixel and frame by frame is calculated by the following relation:

$$g(\xi, \eta, \tau) = \frac{\langle i(x, y, t) i(x + \xi, y + \eta, t + \tau) \rangle}{\langle i(x, y, t) \rangle^2} - 1 \quad (1)$$

where  $\xi$  and  $\eta$  are the distance between correlated pixels in the  $x$  and  $y$  directions, respectively,  $\tau$  is the time lag,  $i(x, y, t)$  is the fluorescence intensity at point  $(x, y)$  and time  $t$ , and  $\langle i(x, y, t) i(x + \xi, y + \eta, t + \tau) \rangle$  indicates the average over spatial and time variables  $x, y$  and  $t$ . After calculation,  $g(\xi, \eta, \tau)$  fits to standard Gaussian functions, i.e.

$$g(\xi, \eta, \tau) = g_{\infty} + g_1(\tau) \exp \left\{ - \frac{(\xi - v_{\xi} \tau)^2 + (\eta - v_{\eta} \tau)^2}{\sigma^2(\tau)} \right\} \quad (2)$$

where the numerator of the exponential term describes the net flux of particles, if any, along a specific direction in terms of average velocity, i.e.  $\langle \vec{v} \rangle = \vec{v}_{\Phi} = (v_{\xi}; v_{\eta})$ . (C) The image-derived Mean

Square Displacement (*i*MSD) is given by the variance of the Gaussian function fitting spatiotemporal correlation function is given by:

$$\sigma^2(\tau) = \sigma_0^2 + 4D\tau + v_\sigma^2\tau^2 \quad (3)$$

When *i*MSD is linear (solid line)  $v_\sigma=0$  and particles undergo Brownian diffusion. On the other side, when *i*MSD is parabolic (dashed line)  $v_\sigma \neq 0$  and particles are actively transported. Thus, using Eq.3, we determined diffusion coefficient *D* and speed *v* (as  $v^2=v_\varphi^2 + v_\sigma^2$ ) of bare liposomes, liposome-BC complexes and endocytic vesicles.

**Table S1.** The full list of the most abundant corona proteins associated with MC liposomes as identified by NanoLC-MS/MS.

| Identified Proteins                                                             | Accession Number | Molecular Weight (kDa) | RPA (%) | St. Dev. (%) |
|---------------------------------------------------------------------------------|------------------|------------------------|---------|--------------|
| Apolipoprotein A-I OS=Homo sapiens GN=APOA1 PE=1 SV=1                           | APOA1_HUMAN      | 31                     | 2.688   | 0.072        |
| Apolipoprotein C-II OS=Homo sapiens GN=APOC2 PE=1 SV=1                          | APOC2_HUMAN      | 11                     | 2.663   | 0.065        |
| Apolipoprotein E OS=Homo sapiens GN=APOE PE=1 SV=1                              | APOE_HUMAN       | 36                     | 2.440   | 0.064        |
| Apolipoprotein C-III OS=Homo sapiens GN=APOC3 PE=1 SV=1                         | APOC3_HUMAN      | 11                     | 2.365   | 0.054        |
| Apolipoprotein A-IV OS=Homo sapiens GN=APOA4 PE=1 SV=3                          | APOA4_HUMAN      | 45                     | 2.220   | 0.049        |
| Apolipoprotein C-I OS=Homo sapiens GN=APOC1 PE=1 SV=1                           | APOC1_HUMAN      | 9                      | 1.743   | 0.040        |
| Apolipoprotein A-II OS=Homo sapiens GN=APOA2 PE=1 SV=1                          | APOA2_HUMAN      | 11                     | 1.667   | 0.040        |
| Complement C3 OS=Homo sapiens GN=C3 PE=1 SV=2                                   | CO3_HUMAN        | 187                    | 1.658   | 0.042        |
| Keratin, type II cytoskeletal 1 OS=Homo sapiens GN=KRT1 PE=1 SV=6               | K2C1_HUMAN       | 66                     | 1.505   | 0.042        |
| Prothrombin OS=Homo sapiens GN=F2 PE=1 SV=2                                     | THR_B_HUMAN      | 70                     | 1.505   | 0.039        |
| Complement C4-B OS=Homo sapiens GN=C4B PE=1 SV=1                                | CO4B_HUMAN       | 193                    | 1.473   | 0.040        |
| Fibrinogen beta chain OS=Homo sapiens GN=FGB PE=1 SV=2                          | FIBB_HUMAN       | 56                     | 1.460   | 0.038        |
| Tropomyosin alpha-4 chain OS=Homo sapiens GN=TPM4 PE=1 SV=3                     | TPM4_HUMAN       | 29                     | 1.437   | 0.041        |
| Ig kappa chain C region OS=Homo sapiens GN=IGKC PE=1 SV=1                       | IGKC_HUMAN       | 12                     | 1.383   | 0.034        |
| Serum albumin OS=Homo sapiens GN=ALB PE=1 SV=2                                  | ALBU_HUMAN       | 69                     | 1.355   | 0.036        |
| Vitronectin OS=Homo sapiens GN=VTN PE=1 SV=1                                    | VTNC_HUMAN       | 54                     | 1.295   | 0.031        |
| Inter-alpha-trypsin inhibitor heavy chain H2 OS=Homo sapiens GN=ITIH2 PE=1 SV=2 | ITIH2_HUMAN      | 106                    | 1.292   | 0.032        |
| Transferrin OS=Homo sapiens GN=TTR PE=1 SV=1                                    | TTHY_HUMAN       | 16                     | 1.273   | 0.033        |
| Hemoglobin subunit beta OS=Homo sapiens GN=HBB PE=1 SV=2                        | HBB_HUMAN        | 16                     | 1.259   | 0.038        |
| Ig kappa chain V-III region HAH OS=Homo sapiens PE=2 SV=1                       | KV312_HUMAN (+1) | 14                     | 1.243   | 0.035        |
| Ig lambda-2 chain C regions OS=Homo sapiens GN=IGLC2 PE=1 SV=1                  | LAC2_HUMAN       | 11                     | 1.230   | 0.033        |
| Fibrinogen gamma chain OS=Homo sapiens GN=FGG PE=1 SV=3                         | FIBG_HUMAN       | 52                     | 1.209   | 0.031        |
| Keratin, type I cytoskeletal 9 OS=Homo sapiens GN=KRT9 PE=1 SV=3                | K1C9_HUMAN       | 62                     | 1.188   | 0.033        |
| Clusterin OS=Homo sapiens GN=CLU PE=1 SV=1                                      | CLUS_HUMAN       | 52                     | 1.175   | 0.032        |
| Fibrinogen alpha chain OS=Homo sapiens GN=FGA PE=1 SV=2                         | FIBA_HUMAN       | 95                     | 1.174   | 0.029        |
| Keratin, type I cytoskeletal 10 OS=Homo sapiens GN=KRT10 PE=1 SV=6              | K1C10_HUMAN      | 59                     | 1.160   | 0.026        |
| Serum paraoxonase/arylesterase 1 OS=Homo sapiens GN=PON1 PE=1 SV=3              | PON1_HUMAN       | 40                     | 1.137   | 0.030        |
| Thymosin beta-4 OS=Homo sapiens GN=TMSB4X PE=1 SV=2                             | TYB4_HUMAN       | 5                      | 1.099   | 0.027        |
| Alpha-1-antitrypsin OS=Homo sapiens GN=SERPINA1 PE=1 SV=3                       | A1AT_HUMAN       | 47                     | 1.093   | 0.032        |
| Ig mu chain C region OS=Homo sapiens GN=IGHM PE=1 SV=3                          | IGHM_HUMAN       | 49                     | 1.025   | 0.026        |
| Protein Z-dependent protease inhibitor OS=Homo sapiens GN=SERPINA10 PE=1 SV=1   | ZPI_HUMAN        | 51                     | 0.997   | 0.027        |
| Inter-alpha-trypsin inhibitor heavy chain H3 OS=Homo sapiens GN=ITIH3 PE=1 SV=2 | ITIH3_HUMAN      | 100                    | 0.996   | 0.024        |
| Inter-alpha-trypsin inhibitor heavy chain H1 OS=Homo sapiens GN=ITIH1 PE=1 SV=3 | ITIH1_HUMAN      | 101                    | 0.995   | 0.030        |
| Actin, cytoplasmic 1 OS=Homo sapiens GN=ACTB PE=1 SV=1                          | ACTB_HUMAN       | 42                     | 0.967   | 0.024        |
| Vitamin K-dependent protein S OS=Homo sapiens GN=PROS1 PE=1 SV=1                | PROS_HUMAN       | 75                     | 0.958   | 0.021        |
| C-reactive protein OS=Homo sapiens GN=CRP PE=1 SV=1                             | CRP_HUMAN        | 25                     | 0.940   | 0.025        |
| Apolipoprotein D OS=Homo sapiens GN=APOD PE=1 SV=1                              | APOD_HUMAN       | 21                     | 0.931   | 0.028        |
| Keratin, type II cytoskeletal 2 epidermal OS=Homo sapiens GN=KRT2 PE=1 SV=2     | K22E_HUMAN       | 65                     | 0.928   | 0.023        |
| Serum amyloid A-1 protein OS=Homo sapiens GN=SAA1 PE=1 SV=1                     | SAA1_HUMAN       | 14                     | 0.921   | 0.024        |
| Apolipoprotein B-100 OS=Homo sapiens GN=APOB PE=1 SV=2                          | APOB_HUMAN       | 516                    | 0.860   | 0.023        |
| C4b-binding protein alpha chain OS=Homo sapiens GN=C4BPA PE=1 SV=2              | C4BPA_HUMAN      | 67                     | 0.832   | 0.025        |
| Hyaluronan-binding protein 2 OS=Homo sapiens GN=HABP2 PE=1 SV=1                 | HABP2_HUMAN      | 63                     | 0.807   | 0.022        |
| Gelsolin OS=Homo sapiens GN=GSN PE=1 SV=1                                       | GELS_HUMAN       | 86                     | 0.800   | 0.020        |
| Ig gamma-1 chain C region OS=Homo sapiens GN=IGHG1 PE=1 SV=1                    | IGHG1_HUMAN      | 36                     | 0.798   | 0.019        |
| Ig kappa chain V-IV region (Fragment) OS=Homo sapiens GN=IGKV4-1 PE=4 SV=1      | KV401_HUMAN (+1) | 13                     | 0.776   | 0.019        |
| Serum amyloid A-4 protein OS=Homo sapiens GN=SAA4 PE=1 SV=2                     | SAA4_HUMAN       | 15                     | 0.759   | 0.019        |
| Vitamin K-dependent protein Z OS=Homo sapiens GN=PROZ PE=1 SV=2                 | PROZ_HUMAN       | 45                     | 0.748   | 0.018        |
| Hemoglobin subunit alpha OS=Homo sapiens GN=HBA1 PE=1 SV=2                      | HBA_HUMAN        | 15                     | 0.745   | 0.019        |
| Collectin-10 OS=Homo sapiens GN=COLEC10 PE=2 SV=2                               | COL10_HUMAN      | 31                     | 0.737   | 0.020        |
| Ig lambda chain V-1 region WAH OS=Homo sapiens PE=1 SV=1                        | LV106_HUMAN      | 12                     | 0.709   | 0.018        |
| Kininogen-1 OS=Homo sapiens GN=KNG1 PE=1 SV=2                                   | KNG1_HUMAN       | 72                     | 0.689   | 0.019        |
| Lumican OS=Homo sapiens GN=LUM PE=1 SV=2                                        | LUM_HUMAN        | 38                     | 0.679   | 0.017        |
| Complement C1q subcomponent subunit C OS=Homo sapiens GN=C1QC PE=1 SV=3         | C1QC_HUMAN       | 26                     | 0.674   | 0.018        |
| Complement component C8 gamma chain OS=Homo sapiens GN=C8G PE=1 SV=3            | CO8G_HUMAN       | 22                     | 0.673   | 0.018        |
| Beta-Ala-His dipeptidase OS=Homo sapiens GN=CNDP1 PE=1 SV=4                     | CNDP1_HUMAN      | 57                     | 0.672   | 0.016        |
| Collectin-11 OS=Homo sapiens GN=COLEC11 PE=1 SV=1                               | COL11_HUMAN      | 29                     | 0.668   | 0.016        |
| Coagulation factor IX OS=Homo sapiens GN=F9 PE=1 SV=2                           | FA9_HUMAN        | 52                     | 0.661   | 0.017        |
| Complement component C9 OS=Homo sapiens GN=C9 PE=1 SV=2                         | CO9_HUMAN        | 63                     | 0.648   | 0.017        |
| Apolipoprotein M OS=Homo sapiens GN=APOM PE=1 SV=2                              | APOM_HUMAN       | 21                     | 0.616   | 0.016        |
| C4b-binding protein beta chain OS=Homo sapiens GN=C4BPB PE=1 SV=1               | C4BPB_HUMAN      | 28                     | 0.611   | 0.016        |
| Alpha-2-macroglobulin OS=Homo sapiens GN=A2M PE=1 SV=3                          | A2MG_HUMAN       | 163                    | 0.573   | 0.015        |
| Vitamin K-dependent protein C OS=Homo sapiens GN=PROC PE=1 SV=1                 | PROC_HUMAN       | 52                     | 0.571   | 0.014        |
| Dermcidin OS=Homo sapiens GN=DCD PE=1 SV=2                                      | DCD_HUMAN        | 11                     | 0.565   | 0.015        |
| Haptoglobin-related protein OS=Homo sapiens GN=HPR PE=1 SV=2                    | HPTR_HUMAN       | 39                     | 0.555   | 0.014        |
| Complement component C8 beta chain OS=Homo sapiens GN=C8B PE=1 SV=3             | CO8B_HUMAN       | 67                     | 0.551   | 0.015        |
| Complement C1s subcomponent OS=Homo sapiens GN=C1S PE=1 SV=1                    | C1S_HUMAN        | 77                     | 0.546   | 0.014        |
| Plasma protease C1 inhibitor OS=Homo sapiens GN=SERPING1 PE=1 SV=2              | IC1_HUMAN        | 55                     | 0.544   | 0.015        |
| Heparin cofactor 2 OS=Homo sapiens GN=SERPIND1 PE=1 SV=3                        | HEP2_HUMAN       | 57                     | 0.531   | 0.014        |
| Complement C1q subcomponent subunit B OS=Homo sapiens GN=C1QB PE=1 SV=3         | C1QB_HUMAN       | 27                     | 0.526   | 0.015        |
| Histidine-rich glycoprotein OS=Homo sapiens GN=HRG PE=1 SV=1                    | HRG_HUMAN        | 60                     | 0.519   | 0.013        |
| Complement C5 OS=Homo sapiens GN=C5 PE=1 SV=4                                   | CO5_HUMAN        | 188                    | 0.506   | 0.014        |
| Ig heavy chain V-III region BUT OS=Homo sapiens PE=1 SV=1                       | HV306_HUMAN      | 12                     | 0.505   | 0.015        |
| Serotransferrin OS=Homo sapiens GN=TF PE=1 SV=3                                 | TRFE_HUMAN       | 77                     | 0.495   | 0.012        |
| Apolipoprotein C-IV OS=Homo sapiens GN=APOC4 PE=1 SV=1                          | APOC4_HUMAN      | 15                     | 0.487   | 0.014        |
| Ig alpha-1 chain C region OS=Homo sapiens GN=IGHA1 PE=1 SV=2                    | IGHA1_HUMAN      | 38                     | 0.486   | 0.014        |
| Immunoglobulin J chain OS=Homo sapiens GN=IGJ PE=1 SV=4                         | IGJ_HUMAN        | 18                     | 0.481   | 0.013        |
| Complement factor H OS=Homo sapiens GN=CFH PE=1 SV=4                            | CFAH_HUMAN       | 139                    | 0.480   | 0.012        |
| Tubulin alpha-4A chain OS=Homo sapiens GN=TUBA4A PE=1 SV=1                      | TBA4A_HUMAN      | 50                     | 0.477   | 0.012        |
| Angiotensin-related protein 6 OS=Homo sapiens GN=ANGPTL6 PE=1 SV=1              | ANGL6_HUMAN      | 52                     | 0.476   | 0.012        |

|                                                                                             |                 |     |       |       |
|---------------------------------------------------------------------------------------------|-----------------|-----|-------|-------|
| Haptoglobin OS=Homo sapiens GN=HP PE=1 SV=1                                                 | HPT_HUMAN       | 45  | 0.402 | 0.011 |
| Extracellular superoxide dismutase [Cu-Zn] OS=Homo sapiens GN=SOD3 PE=1 SV=2                | SODE_HUMAN      | 26  | 0.396 | 0.011 |
| Pigment epithelium-derived factor OS=Homo sapiens GN=SERPINF1 PE=1 SV=4                     | PEDF_HUMAN      | 46  | 0.396 | 0.010 |
| Apolipoprotein A-V OS=Homo sapiens GN=APOA5 PE=1 SV=1                                       | APOA5_HUMAN     | 41  | 0.390 | 0.009 |
| Ceruloplasmin OS=Homo sapiens GN=CP PE=1 SV=1                                               | CERU_HUMAN      | 122 | 0.388 | 0.010 |
| Alpha-1-antichymotrypsin OS=Homo sapiens GN=SERPINA3 PE=1 SV=2                              | AACT_HUMAN      | 48  | 0.387 | 0.009 |
| Secreted phosphoprotein 24 OS=Homo sapiens GN=SPP2 PE=1 SV=1                                | SPP24_HUMAN     | 24  | 0.385 | 0.009 |
| Tubulin beta chain OS=Homo sapiens GN=TUBB PE=1 SV=2                                        | TBB5_HUMAN      | 50  | 0.378 | 0.010 |
| Apolipoprotein F OS=Homo sapiens GN=APOF PE=1 SV=2                                          | APOF_HUMAN      | 35  | 0.369 | 0.010 |
| Coagulation factor X OS=Homo sapiens GN=F10 PE=1 SV=2                                       | FA10_HUMAN      | 55  | 0.357 | 0.009 |
| Ig heavy chain V-III region TRO OS=Homo sapiens PE=1 SV=1                                   | HV301_HUMAN     | 13  | 0.357 | 0.008 |
| Complement factor B OS=Homo sapiens GN=CFB PE=1 SV=2                                        | CFAB_HUMAN      | 86  | 0.332 | 0.008 |
| Immunoglobulin lambda-like polypeptide 5 OS=Homo sapiens GN=IGLL5 PE=2 SV=2                 | IGLL5_HUMAN     | 23  | 0.313 | 0.008 |
| Cartilage oligomeric matrix protein OS=Homo sapiens GN=COMP PE=1 SV=2                       | COMP_HUMAN      | 83  | 0.305 | 0.008 |
| Keratin, type I cytoskeletal 14 OS=Homo sapiens GN=KRT14 PE=1 SV=4                          | K1C14_HUMAN     | 52  | 0.296 | 0.007 |
| Lipopolysaccharide-binding protein OS=Homo sapiens GN=LBP PE=1 SV=3                         | LBP_HUMAN       | 53  | 0.288 | 0.007 |
| Complement C1r subcomponent OS=Homo sapiens GN=C1R PE=1 SV=2                                | C1R_HUMAN       | 80  | 0.286 | 0.007 |
| Serum amyloid A-2 protein OS=Homo sapiens GN=SAA2 PE=1 SV=1                                 | SAA2_HUMAN      | 14  | 0.281 | 0.008 |
| Keratin, type II cytoskeletal 5 OS=Homo sapiens GN=KRT5 PE=1 SV=3                           | K2C5_HUMAN      | 62  | 0.264 | 0.006 |
| Fibronectin OS=Homo sapiens GN=FN1 PE=1 SV=1                                                | FINC_HUMAN      | 263 | 0.261 | 0.006 |
| Glucosidase 2 subunit beta OS=Homo sapiens GN=PRKCSH PE=1 SV=2                              | GLU2B_HUMAN     | 59  | 0.258 | 0.007 |
| Keratin, type II cuticular Hb3 OS=Homo sapiens GN=KRT83 PE=1 SV=2                           | KRT83_HUMAN     | 54  | 0.252 | 0.007 |
| Myosin light polypeptide 6 OS=Homo sapiens GN=MYL6 PE=1 SV=2                                | MYL6_HUMAN      | 17  | 0.243 | 0.007 |
| Selenoprotein P OS=Homo sapiens GN=SEPP1 PE=1 SV=3                                          | SEPP1_HUMAN     | 43  | 0.234 | 0.007 |
| Tubulin beta-1 chain OS=Homo sapiens GN=TUBB1 PE=1 SV=1                                     | TBB1_HUMAN      | 50  | 0.233 | 0.006 |
| Complement C1q subcomponent subunit A OS=Homo sapiens GN=C1QA PE=1 SV=2                     | C1QA_HUMAN      | 26  | 0.233 | 0.006 |
| N-acetylmuramoyl-L-alanine amidase OS=Homo sapiens GN=PGLYRP2 PE=1 SV=1                     | PGRP2_HUMAN     | 62  | 0.224 | 0.005 |
| Complement factor I OS=Homo sapiens GN=CFI PE=1 SV=2                                        | CFAL_HUMAN      | 66  | 0.221 | 0.006 |
| Coagulation factor VII OS=Homo sapiens GN=F7 PE=1 SV=1                                      | FA7_HUMAN       | 52  | 0.212 | 0.006 |
| Phosphatidylcholine-sterol acyltransferase OS=Homo sapiens GN=LCAT PE=1 SV=1                | LCAT_HUMAN      | 50  | 0.210 | 0.005 |
| Inter-alpha-trypsin inhibitor heavy chain H4 OS=Homo sapiens GN=ITH4 PE=1 SV=4              | ITH4_HUMAN      | 103 | 0.209 | 0.006 |
| Ig gamma-3 chain C region OS=Homo sapiens GN=IGHG3 PE=1 SV=2                                | IGHG3_HUMAN     | 41  | 0.204 | 0.006 |
| Galectin-3-binding protein OS=Homo sapiens GN=LGALS3BP PE=1 SV=1                            | LG3BP_HUMAN     | 65  | 0.200 | 0.005 |
| Dickkopf-related protein 3 OS=Homo sapiens GN=DKK3 PE=1 SV=2                                | DKK3_HUMAN      | 38  | 0.195 | 0.005 |
| Integrin alpha-1Ib OS=Homo sapiens GN=ITGA2B PE=1 SV=3                                      | ITA2B_HUMAN     | 113 | 0.191 | 0.005 |
| Ig kappa chain V-III region POM OS=Homo sapiens PE=1 SV=1                                   | KV306_HUMAN     | 12  | 0.190 | 0.005 |
| Ig lambda chain V-III region LOI OS=Homo sapiens PE=1 SV=1                                  | LV302_HUMAN     | 12  | 0.187 | 0.005 |
| Protein AMBP OS=Homo sapiens GN=AMBP PE=1 SV=1                                              | AMBP_HUMAN      | 39  | 0.179 | 0.004 |
| Mannan-binding lectin serine protease 1 OS=Homo sapiens GN=MASP1 PE=1 SV=3                  | MASP1_HUMAN     | 79  | 0.178 | 0.005 |
| Alpha-2-antiplasmin OS=Homo sapiens GN=SERPINF2 PE=1 SV=3                                   | A2AP_HUMAN      | 55  | 0.178 | 0.005 |
| Matrix Gla protein OS=Homo sapiens GN=MGP PE=1 SV=2                                         | MGP_HUMAN       | 12  | 0.177 | 0.005 |
| Alpha-2-HS-glycoprotein OS=Homo sapiens GN=AHSG PE=1 SV=1                                   | FETUA_HUMAN     | 39  | 0.177 | 0.004 |
| Thrombospondin-4 OS=Homo sapiens GN=THBS4 PE=1 SV=2                                         | TSP4_HUMAN      | 106 | 0.176 | 0.005 |
| Kallistatin OS=Homo sapiens GN=SERPINA4 PE=1 SV=3                                           | KAIN_HUMAN      | 49  | 0.173 | 0.004 |
| Ig heavy chain V-III region WEA OS=Homo sapiens PE=1 SV=1                                   | HV302_HUMAN     | 12  | 0.171 | 0.005 |
| Ig kappa chain V-I region AG OS=Homo sapiens PE=1 SV=1                                      | KV101_HUMAN     | 12  | 0.168 | 0.005 |
| Calreticulin OS=Homo sapiens GN=CALR PE=1 SV=1                                              | CALR_HUMAN      | 48  | 0.160 | 0.004 |
| Ig kappa chain V-III region VG (Fragment) OS=Homo sapiens PE=1 SV=1                         | KV309_HUMAN     | 13  | 0.151 | 0.004 |
| Integrin beta-3 OS=Homo sapiens GN=ITGB3 PE=1 SV=2                                          | ITB3_HUMAN      | 87  | 0.151 | 0.004 |
| Mannose-binding protein C OS=Homo sapiens GN=MBL2 PE=1 SV=2                                 | MBL2_HUMAN      | 26  | 0.149 | 0.005 |
| Microtubule-associated protein RP/EB family member 2 OS=Homo sapiens GN=MAPRE2 PE=1 SV=1    | MARE2_HUMAN     | 37  | 0.149 | 0.004 |
| Plasminogen OS=Homo sapiens GN=PLG PE=1 SV=2                                                | PLMN_HUMAN      | 91  | 0.147 | 0.004 |
| Complement component C6 OS=Homo sapiens GN=C6 PE=1 SV=3                                     | CO6_HUMAN       | 105 | 0.143 | 0.004 |
| Filamin-A OS=Homo sapiens GN=FLNA PE=1 SV=4                                                 | FLNA_HUMAN      | 281 | 0.141 | 0.004 |
| Profilin-1 OS=Homo sapiens GN=PFN1 PE=1 SV=2                                                | PROF1_HUMAN     | 15  | 0.140 | 0.003 |
| Tropomyosin alpha-3 chain OS=Homo sapiens GN=TPM3 PE=1 SV=1                                 | TPM3_HUMAN      | 33  | 0.139 | 0.004 |
| Bone marrow proteoglycan OS=Homo sapiens GN=PRG2 PE=1 SV=2                                  | PRG2_HUMAN      | 25  | 0.137 | 0.003 |
| Talin-1 OS=Homo sapiens GN=TLN1 PE=1 SV=3                                                   | TLN1_HUMAN      | 270 | 0.137 | 0.003 |
| Keratin, type I cytoskeletal 16 OS=Homo sapiens GN=KRT16 PE=1 SV=4                          | K1C16_HUMAN     | 51  | 0.136 | 0.004 |
| Carboxypeptidase N subunit 2 OS=Homo sapiens GN=CPN2 PE=1 SV=3                              | CPN2_HUMAN      | 61  | 0.132 | 0.004 |
| von Willebrand factor OS=Homo sapiens GN=VWF PE=1 SV=4                                      | VWF_HUMAN       | 309 | 0.132 | 0.003 |
| Keratin, type I cuticular Ha1 OS=Homo sapiens GN=KRT31 PE=2 SV=3                            | K1H1_HUMAN      | 47  | 0.121 | 0.003 |
| Peptidyl-prolyl cis-trans isomerase A OS=Homo sapiens GN=PPIA PE=1 SV=2                     | PPIA_HUMAN      | 18  | 0.118 | 0.003 |
| Ig gamma-2 chain C region OS=Homo sapiens GN=IGHG2 PE=1 SV=2                                | IGHG2_HUMAN     | 36  | 0.115 | 0.003 |
| Antithrombin-III OS=Homo sapiens GN=SERPINC1 PE=1 SV=1                                      | ANT3_HUMAN      | 53  | 0.111 | 0.003 |
| Procollagen C-endopeptidase enhancer 1 OS=Homo sapiens GN=PCOLCE PE=1 SV=2                  | PCOC1_HUMAN     | 48  | 0.108 | 0.003 |
| Erythrocyte band 7 integral membrane protein OS=Homo sapiens GN=STOM PE=1 SV=3              | STOM_HUMAN      | 32  | 0.106 | 0.003 |
| 14-3-3 protein zeta/delta OS=Homo sapiens GN=YWHAZ PE=1 SV=1                                | 1433Z_HUMAN     | 28  | 0.106 | 0.003 |
| Complement component C7 OS=Homo sapiens GN=C7 PE=1 SV=2                                     | CO7_HUMAN       | 94  | 0.105 | 0.003 |
| Myosin-9 OS=Homo sapiens GN=MYH9 PE=1 SV=4                                                  | MYH9_HUMAN      | 227 | 0.103 | 0.003 |
| Transforming growth factor-beta-induced protein ig-h3 OS=Homo sapiens GN=TGFBI PE=1 SV=1    | BGH3_HUMAN      | 75  | 0.098 | 0.002 |
| Hemopexin OS=Homo sapiens GN=HPX PE=1 SV=2                                                  | HEMO_HUMAN      | 52  | 0.098 | 0.003 |
| Keratin, type II cytoskeletal 6C OS=Homo sapiens GN=KRT6C PE=1 SV=3                         | K2C6C_HUMAN     | 60  | 0.097 | 0.002 |
| Vitamin D-binding protein OS=Homo sapiens GN=GC PE=1 SV=1                                   | VTDB_HUMAN      | 53  | 0.094 | 0.003 |
| Retinol-binding protein 4 OS=Homo sapiens GN=RBP4 PE=1 SV=3                                 | RET4_HUMAN      | 23  | 0.094 | 0.002 |
| Alpha-1-acid glycoprotein 2 OS=Homo sapiens GN=ORM2 PE=1 SV=2                               | A1AG2_HUMAN     | 24  | 0.089 | 0.003 |
| HLA class I histocompatibility antigen, B-15 alpha chain OS=Homo sapiens GN=HLA-B PE=1 SV=2 | 1B15_HUMAN (+6) | 40  | 0.087 | 0.002 |
| Ig kappa chain V-I region WEA OS=Homo sapiens PE=1 SV=1                                     | KV118_HUMAN     | 12  | 0.085 | 0.002 |
| Nidogen-1 OS=Homo sapiens GN=NID1 PE=1 SV=3                                                 | NID1_HUMAN      | 136 | 0.085 | 0.002 |
| Apolipoprotein(a) OS=Homo sapiens GN=LPA PE=1 SV=1                                          | APOA_HUMAN      | 501 | 0.082 | 0.002 |
| Platelet glycoprotein Ib alpha chain OS=Homo sapiens GN=GP1BA PE=1 SV=1                     | GP1BA_HUMAN     | 69  | 0.076 | 0.002 |
| Lysozyme C OS=Homo sapiens GN=LYZ PE=1 SV=1                                                 | LYSC_HUMAN      | 17  | 0.069 | 0.002 |
| Oncoprotein-induced transcript 3 protein OS=Homo sapiens GN=OIT3 PE=1 SV=2                  | OIT3_HUMAN      | 60  | 0.067 | 0.002 |
| Ficolin-3 OS=Homo sapiens GN=FCN3 PE=1 SV=2                                                 | FCN3_HUMAN      | 33  | 0.066 | 0.002 |
| Glyceraldehyde-3-phosphate dehydrogenase OS=Homo sapiens GN=GAPDH PE=1 SV=3                 | G3P_HUMAN       | 36  | 0.058 | 0.002 |
| Pleckstrin OS=Homo sapiens GN=PLEK PE=1 SV=3                                                | PLEK_HUMAN      | 40  | 0.058 | 0.001 |
| Hornrin OS=Homo sapiens GN=HRNR PE=1 SV=2                                                   | HORN_HUMAN      | 282 | 0.054 | 0.001 |
| Protein convertase subtilisin/kexin type 9 OS=Homo sapiens GN=PCSK9 PE=1 SV=3               | PCSK9_HUMAN     | 74  | 0.053 | 0.002 |
| Monocyte differentiation antigen CD14 OS=Homo sapiens GN=CD14 PE=1 SV=2                     | CD14_HUMAN      | 40  | 0.051 | 0.001 |
| Coagulation factor V OS=Homo sapiens GN=F5 PE=1 SV=4                                        | FA5_HUMAN       | 252 | 0.050 | 0.001 |

|                                                                                                                       |                  |     |       |       |
|-----------------------------------------------------------------------------------------------------------------------|------------------|-----|-------|-------|
| Actin, alpha cardiac muscle 1 OS=Homo sapiens GN=ACTC1 PE=1 SV=1                                                      | ACTC_HUMAN (+1)  | 42  | 0.047 | 0.001 |
| Osteomodulin OS=Homo sapiens GN=OMD PE=1 SV=1                                                                         | OMD_HUMAN        | 49  | 0.046 | 0.001 |
| Integrin-linked protein kinase OS=Homo sapiens GN=ILK PE=1 SV=2                                                       | ILK_HUMAN        | 51  | 0.044 | 0.001 |
| Serum amyloid P-component OS=Homo sapiens GN=APCS PE=1 SV=2                                                           | SAMP_HUMAN       | 25  | 0.043 | 0.001 |
| Tubulin alpha-1B chain OS=Homo sapiens GN=TUBA1B PE=1 SV=1                                                            | TBA1B_HUMAN (+1) | 50  | 0.042 | 0.001 |
| Keratin, type II cuticular Hb2 OS=Homo sapiens GN=KRT82 PE=1 SV=3                                                     | KRT82_HUMAN      | 57  | 0.037 | 0.001 |
| Neuropilin-1 OS=Homo sapiens GN=NRP1 PE=1 SV=3                                                                        | NRP1_HUMAN       | 103 | 0.032 | 0.001 |
| Protein disulfide-isomerase A4 OS=Homo sapiens GN=PDIA4 PE=1 SV=2                                                     | PDIA4_HUMAN      | 73  | 0.031 | 0.001 |
| CD5 antigen-like OS=Homo sapiens GN=CDSL PE=1 SV=1                                                                    | CD5L_HUMAN       | 38  | 0.031 | 0.001 |
| Tropomyosin alpha-1 chain OS=Homo sapiens GN=TPM1 PE=1 SV=2                                                           | TPM1_HUMAN       | 33  | 0.030 | 0.001 |
| Vinculin OS=Homo sapiens GN=VCL PE=1 SV=4                                                                             | VINC_HUMAN       | 124 | 0.027 | 0.001 |
| Fibulin-1 OS=Homo sapiens GN=FBLN1 PE=1 SV=4                                                                          | FBLN1_HUMAN      | 77  | 0.027 | 0.001 |
| CD44 antigen OS=Homo sapiens GN=CD44 PE=1 SV=3                                                                        | CD44_HUMAN       | 82  | 0.026 | 0.001 |
| Neural cell adhesion molecule 1 OS=Homo sapiens GN=NCAM1 PE=1 SV=3                                                    | NCAM1_HUMAN      | 95  | 0.023 | 0.001 |
| Alpha-1B-glycoprotein OS=Homo sapiens GN=A1BG PE=1 SV=4                                                               | A1BG_HUMAN       | 54  | 0.020 | 0.000 |
| Cholesteryl ester transfer protein OS=Homo sapiens GN=CETP PE=1 SV=2                                                  | CETP_HUMAN       | 55  | 0.020 | 0.001 |
| Basement membrane-specific heparan sulfate proteoglycan core protein OS=Homo sapiens GN=HSPG2 PE=1 SV=4               | PGBM_HUMAN       | 469 | 0.019 | 0.000 |
| Tenascin-X OS=Homo sapiens GN=TNXB PE=1 SV=3                                                                          | TENX_HUMAN       | 464 | 0.015 | 0.000 |
| 78 glucose-regulated protein OS=Homo sapiens GN=HSPA5 PE=1 SV=2                                                       | GRP78_HUMAN      | 72  | 0.015 | 0.000 |
| Mannan-binding lectin serine protease 2 OS=Homo sapiens GN=MASP2 PE=1 SV=4                                            | MASP2_HUMAN      | 76  | 0.014 | 0.000 |
| Fermitin family homolog 3 OS=Homo sapiens GN=FERMT3 PE=1 SV=1                                                         | URP2_HUMAN       | 76  | 0.014 | 0.000 |
| Sushi, von Willebrand factor type A, EGF and pentraxin domain-containing protein 1 OS=Homo sapiens GN=SVEP1 PE=1 SV=3 | SVEP1_HUMAN      | 390 | 0.006 | 0.000 |
| Versican core protein OS=Homo sapiens GN=VCAN PE=1 SV=3                                                               | CSPG2_HUMAN      | 373 | 0.005 | 0.000 |
